# Supplementary material for: Asymmetric copper-catalysed intramolecular C–H insertion reactions of α-diazo-β-keto sulfones
Source: Royal Society of Chemistry journal article supplement (doi:10.1039/c0ob00914h), 2010-11-16

## Supporting Information

### Asymmetric Copper-Catalysed C-H Insertion Reactions of $\alpha$ -Diazo- $\beta$ -keto Sulfones.

**Catherine N. Slattery and Anita R. Maguire\***

*Department of Chemistry, School of Pharmacy and Analytical and Biological Chemistry  
Research Facility, University College Cork, Ireland*

#### Table of Contents

|                                                        |    |
|--------------------------------------------------------|----|
| General Experimental                                   | S2 |
| Representative Procedure of the C-H Insertion Reaction | S3 |
| Compound Characterisation                              | S4 |
| References                                             | S6 |
| Chiral HPLC Analysis                                   | S7 |
| NMR spectra of Novel Cyclopentanone                    | S8 |

**General:** DCM was distilled from phosphorous pentoxide and was further distilled from calcium hydride. All C-H insertion reactions were performed in oven-dried or flame-dried glassware under an atmosphere of dry N<sub>2</sub>. Thin layer chromatography (TLC) was carried out on precoated silica gel plates. Visualisation was achieved by UV light detection (254 nm) and vanillin staining. Infra red spectra were recorded as thin films on sodium chloride plates for oils or as potassium bromide (KBr) discs for solids on a 1000 FT-IR spectrometer. <sup>1</sup>H (300/400 MHz), <sup>13</sup>C (75.5 MHz) and <sup>1</sup>H COSY NMR spectra were recorded on a 300/400 NMR spectrometer. All spectra were recorded at 20 °C in deuterated chloroform (CDCl<sub>3</sub>) using tetramethylsilane (TMS) as an internal standard unless otherwise stated. Chemical shifts (δ<sub>H</sub> and δ<sub>C</sub>) are reported in parts per million (ppm) relative to TMS and coupling constants are expressed in Hertz (Hz). Splitting patterns in <sup>1</sup>H spectra are designated as s (singlet), d (doublet), t (triplet), q (quartet), dd (doublet of doublets), m (multiplet) and sym m (symmetrical multiplet). <sup>13</sup>C NMR spectra were calibrated using the solvent signals, *i.e.* CDCl<sub>3</sub>: δ<sub>C</sub> 77.0 ppm. Low resolution mass spectra were recorded in electrospray ionization (ESI) mode using 50% acetonitrile-water containing 0.1% formic acid as eluent; samples were made up in acetonitrile. High resolution precise mass spectra (HRMS) were recorded in electrospray ionization (ESI) mode using 50% acetonitrile-water containing 0.1% formic acid as eluent; samples were made up in acetonitrile. Melting points were measured on a capillary melting point apparatus. Enantiopurity of the chiral compounds were determined by chiral HPLC performed on a Chiralpak AS-H, Chiralpak OJ-H or Chiralcel OD-H column. Optical rotations were measured on a polarimeter at 589 nm in a 10 cm cell; concentrations (*c*) are expressed in g/100 mL.  $[\alpha]_D^T$  is the specific rotation of a compound and is expressed in units of 10<sup>-1</sup> deg cm<sup>2</sup> g<sup>-1</sup>.

**Representative Procedure of the C-H Insertion Reaction.** The CuCl-L-(NaBARF) catalyst was generated *in situ* from a mixture of CuCl (5 mol%) and bis(oxazoline) ligand **1-4** (6 mol%) in CH<sub>2</sub>Cl<sub>2</sub> (20 mL), with or without NaBARF (6 mol%). This catalytic mixture was stirred under nitrogen at 40 °C for 1.5 h.  $\alpha$ -Diazo- $\beta$ -keto sulfone **5-9** (150mg, 1 equiv) was then added dropwise in CH<sub>2</sub>Cl<sub>2</sub> (10 mL) over 0.5 h to the refluxing solution. The progress of the reaction was monitored by TLC and IR spectroscopy, where reaction completion was indicated by the disappearance of the characteristic diazo peak at 2110-2126 cm<sup>-1</sup>. Upon reaction completion, evaporation of the reaction solvent at reduced pressure gave the crude product as a coloured oil. Purification by flash chromatography on silica gel, employing EtOAc-hexane as eluent, gave cyclopentanones **10-14** as white solids.

### Compound Characterisation:

#### *trans*-2-Phenylsulfonyl-3-methylcyclopentanone **10**

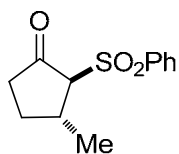

White solid, mp 123-125 °C (lit.<sup>1,2</sup> 124-126 °C);  $\nu_{\max}(\text{KBr})/\text{cm}^{-1}$  1744 (C=O), 1305, 1141 (SO<sub>2</sub>),  $\delta_{\text{H}}(400\text{MHz}, \text{CDCl}_3)$  1.29 (3H, d, *J* 6.8, CH<sub>3</sub>), 1.45-1.53 [1H, m, one of C(4)H<sub>2</sub>], 2.25-2.40 [3H, m, C(5)H<sub>2</sub>, one of C(4)H<sub>2</sub>], 2.95-3.04 [1H, m, C(3)HCH<sub>3</sub>] 3.34 [1H, d, *J* 8.0, C(2)HSO<sub>2</sub>], 7.55-7.90 (5H, m, aromatic H). Spectral characteristics were consistent with previously reported data.<sup>2</sup>

#### *trans*-2-Phenylsulfonyl-3-ethylcyclopentanone **11**

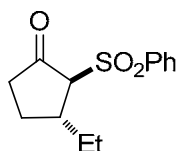

White solid, (Found C, 62.12; H, 6.48. C<sub>13</sub>H<sub>16</sub>O<sub>3</sub>S requires C, 61.88; H, 6.39); mp 78-80 °C (lit.<sup>2</sup> 79-81 °C);  $\nu_{\max}(\text{KBr})/\text{cm}^{-1}$  1743 (C=O), 1308, 1147 (SO<sub>2</sub>),  $\delta_{\text{H}}(300\text{MHz}, \text{CDCl}_3)$  0.98 (3H, t, *J* 7.2, CH<sub>3</sub>), 1.39-1.57 (2H, m, one of CH<sub>2</sub>CH<sub>3</sub> and one of C(4)H<sub>2</sub>), 1.74-1.87 [1H, m, one of CH<sub>2</sub>CH<sub>3</sub>], 2.28-2.46 [3H, m, C(5)H<sub>2</sub>, one of C(4)H<sub>2</sub>], 2.82-2.94 [1H, m, C(3)HCH<sub>2</sub>CH<sub>3</sub>], 3.39 [1H, d, *J* 6.9, C(2)HSO<sub>2</sub>], 7.55-7.89 (5H, m, aromatic H). Spectral characteristics were consistent with previously reported data.<sup>2</sup>

#### *trans*-2-Phenylsulfonyl-3-*i*-propylcyclopentanone **12**

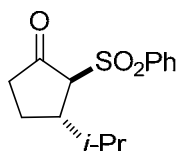

White solid, (Found C, 63.06; H, 6.79. C<sub>14</sub>H<sub>18</sub>O<sub>3</sub>S requires C, 63.13; H, 6.81); mp 96-98 °C;  $\nu_{\max}(\text{KBr})/\text{cm}^{-1}$  1746 (C=O), 1302, 1140 (SO<sub>2</sub>),  $\delta_{\text{H}}(400\text{MHz}, \text{CDCl}_3)$  0.91 [3H, d, *J* 6.8, one of CH(CH<sub>3</sub>)<sub>2</sub>], 0.97 [3H, d, *J* 6.8, one of CH(CH<sub>3</sub>)<sub>2</sub>], 1.65-1.74 [1H, m, one of C(4)H<sub>2</sub>], 1.85-1.96 [1H, sym m, CH(CH<sub>3</sub>)<sub>2</sub>], 2.19-2.35 [2H, m, one of C(4)H<sub>2</sub> and one of C(5)H<sub>2</sub>], 2.44-2.54 [1H, m, one of C(5)H<sub>2</sub>], 2.86-2.94 [1H, sym m, C(3)Hi-Pr], 3.51 [1H, d, *J* 5.2, C(2)HSO<sub>2</sub>],

7.57-7.87 (5H, m, aromatic H);  $\delta_{\text{C}}$ (75.5MHz,  $\text{CDCl}_3$ ) 18.1 [one of  $\text{CH}(\text{CH}_3)_2$ ], 20.5 [one of  $\text{CH}(\text{CH}_3)_2$ ], 22.1 [ $\text{C}(4)\text{H}_2$ ], 31.0 [ $\text{CH}(\text{CH}_3)_2$ ], 38.4 [ $\text{C}(5)\text{H}_2$ ], 43.2 ( $\text{CHi-Pr}$ ), 73.0 ( $\text{CHSO}_2\text{Ph}$ ), 129.1 ( $\text{CH}$ , s,  $4 \times \text{CH}$  aromatic), 134.1 ( $\text{CH}$  aromatic), 134.0 ( $\text{C}$  aromatic), 207.6 ( $\text{CO}$ );  $m/z$  ( $\text{ES}^+$ ) 267.0 [ $(\text{M}+\text{H})^+$ , 100%], 284.1 [ $(\text{M}+\text{H}_2\text{O})^+$ , 72%], 552.4 (89%).

*trans*-2-Phenylsulfonyl-3-phenylcyclopentanone **13**

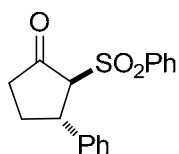

White solid, (Found C, 67.59; H, 5.43.  $\text{C}_{17}\text{H}_{16}\text{O}_3\text{S}$  requires C, 67.98; H, 5.37); mp 96-99 °C (lit.<sup>2</sup> 96-98 °C);  $\nu_{\text{max}}$ (KBr)/ $\text{cm}^{-1}$  1743 ( $\text{C}=\text{O}$ ), 1306, 1150 ( $\text{SO}_2$ ),  $\delta_{\text{H}}$ (400MHz,  $\text{CDCl}_3$ ) 1.94-2.05 [1H, m, one of  $\text{C}(4)\text{H}_2$ ], 2.52-2.68 [3H, m,  $\text{C}(5)\text{H}_2$ , one of  $\text{C}(4)\text{H}_2$ ], 3.91 [1H, d,  $J$  7.6,  $\text{C}(2)\text{HSO}_2$ ], 4.07-4.17 [1H, sym m,  $J$  7.6,  $\text{C}(3)\text{HPh}$ ], 7.19-7.31 (5H, m, aromatic H of phenyl group), 7.48-7.81 (5H, m, aromatic H of phenylsulfonyl group). Spectral characteristics were consistent with previously reported data.<sup>2</sup>

*trans*-2-Phenylsulfonyl-3-benzylcyclopentanone **14**

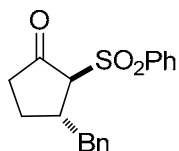

White solid, (Found C, 68.54; H, 5.69.  $\text{C}_{18}\text{H}_{18}\text{O}_3\text{S}$  requires C, 68.76; H, 5.77); mp 83-85 °C (lit.<sup>2</sup> 85-86 °C);  $\nu_{\text{max}}$ (KBr)/ $\text{cm}^{-1}$  1750 ( $\text{C}=\text{O}$ ), 1307, 1142 ( $\text{SO}_2$ ),  $\delta_{\text{H}}$ (400MHz,  $\text{CDCl}_3$ ) 1.57-1.66 [1H, m, one of  $\text{C}(4)\text{H}_2$ ], 2.16-2.41 [3H, m,  $\text{C}(5)\text{H}_2$ , one of  $\text{C}(4)\text{H}_2$ ], 2.74-2.80 [1H, dd,  $\text{H}_\text{A}$  of ABC,  $J$  13.6, 8.8 one of  $\text{CH}_2\text{Ph}$ ], 3.04-3.08 [1H, dd,  $\text{H}_\text{B}$  of ABC,  $J$  13.2, 5.2, one of  $\text{CH}_2\text{Ph}$ ], 3.14-3.24 [1H, m,  $\text{H}_\text{C}$  of ABC,  $\text{C}(3)\text{HBn}$ ], 3.49 [1H, d,  $J$  7.2,  $\text{C}(1)\text{HSO}_2$ ], 7.16-7.32 (5H, m, aromatic H of phenyl group), 7.55-7.86 (5H, m, aromatic H of phenylsulfonyl group). Spectral characteristics were consistent with previously reported data.<sup>2</sup>

**References:**

- (1) Monteiro, H. J. *Tetrahedron Lett.* **1987**, *28*, 3459.
- (2) Maguire, A. R.; Kelleher, L. L.; Ferguson, G. *Journal of Molecular Catalysis B: Enzymatic* **1996**, *1*, 115.

HPLC conditions for the resolution of cyclopentanones **10-14**

| Figure                                                                            | R            | Compound  | Column         | UV<br>(nm) | Eluent                  | Flow<br>(ml/min) | Temp. | Retention Time             |       |
|-----------------------------------------------------------------------------------|--------------|-----------|----------------|------------|-------------------------|------------------|-------|----------------------------|-------|
|                                                                                   |              |           |                |            |                         |                  |       | Enantiomer                 | (min) |
| 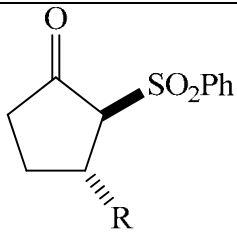 | Me           | <b>10</b> | Chiralcel OD-H | 210        | Hexane : IPA<br>90 : 10 | 1.0              | rt    | (2 <i>R</i> , 3 <i>S</i> ) | 40    |
|                                                                                   |              |           |                |            |                         |                  |       | (2 <i>S</i> , 3 <i>R</i> ) | 50    |
|                                                                                   | Et           | <b>11</b> | Chiralcel OD-H | 210        | Hexane : IPA<br>90 : 10 | 1.0              | rt    | (2 <i>R</i> , 3 <i>S</i> ) | 22    |
|                                                                                   |              |           |                |            |                         |                  |       | (2 <i>S</i> , 3 <i>R</i> ) | 27    |
|                                                                                   | <i>i</i> -Pr | <b>12</b> | Chiralpak OJ-H | 218        | Hexane : IPA<br>70 : 30 | 1.0              | rt    | (2 <i>R</i> , 3 <i>R</i> ) | 16    |
|                                                                                   |              |           |                |            |                         |                  |       | (2 <i>S</i> , 3 <i>S</i> ) | 20    |
|                                                                                   | Ph           | <b>13</b> | Chiralpak OJ-H | 217        | Hexane : IPA<br>60 : 40 | 1.0              | rt    | (2 <i>R</i> , 3 <i>R</i> ) | 84    |
|                                                                                   |              |           |                |            |                         |                  |       | (2 <i>S</i> , 3 <i>S</i> ) | 139   |
|                                                                                   | Bn           | <b>14</b> | Chiralpak AS-H | 210        | Hexane : IPA<br>90 : 10 | 1.0              | rt    | (2 <i>R</i> , 3 <i>R</i> ) | 71    |
|                                                                                   |              |           |                |            |                         |                  |       | (2 <i>S</i> , 3 <i>S</i> ) | 202   |

<sup>1</sup>H NMR of **12**

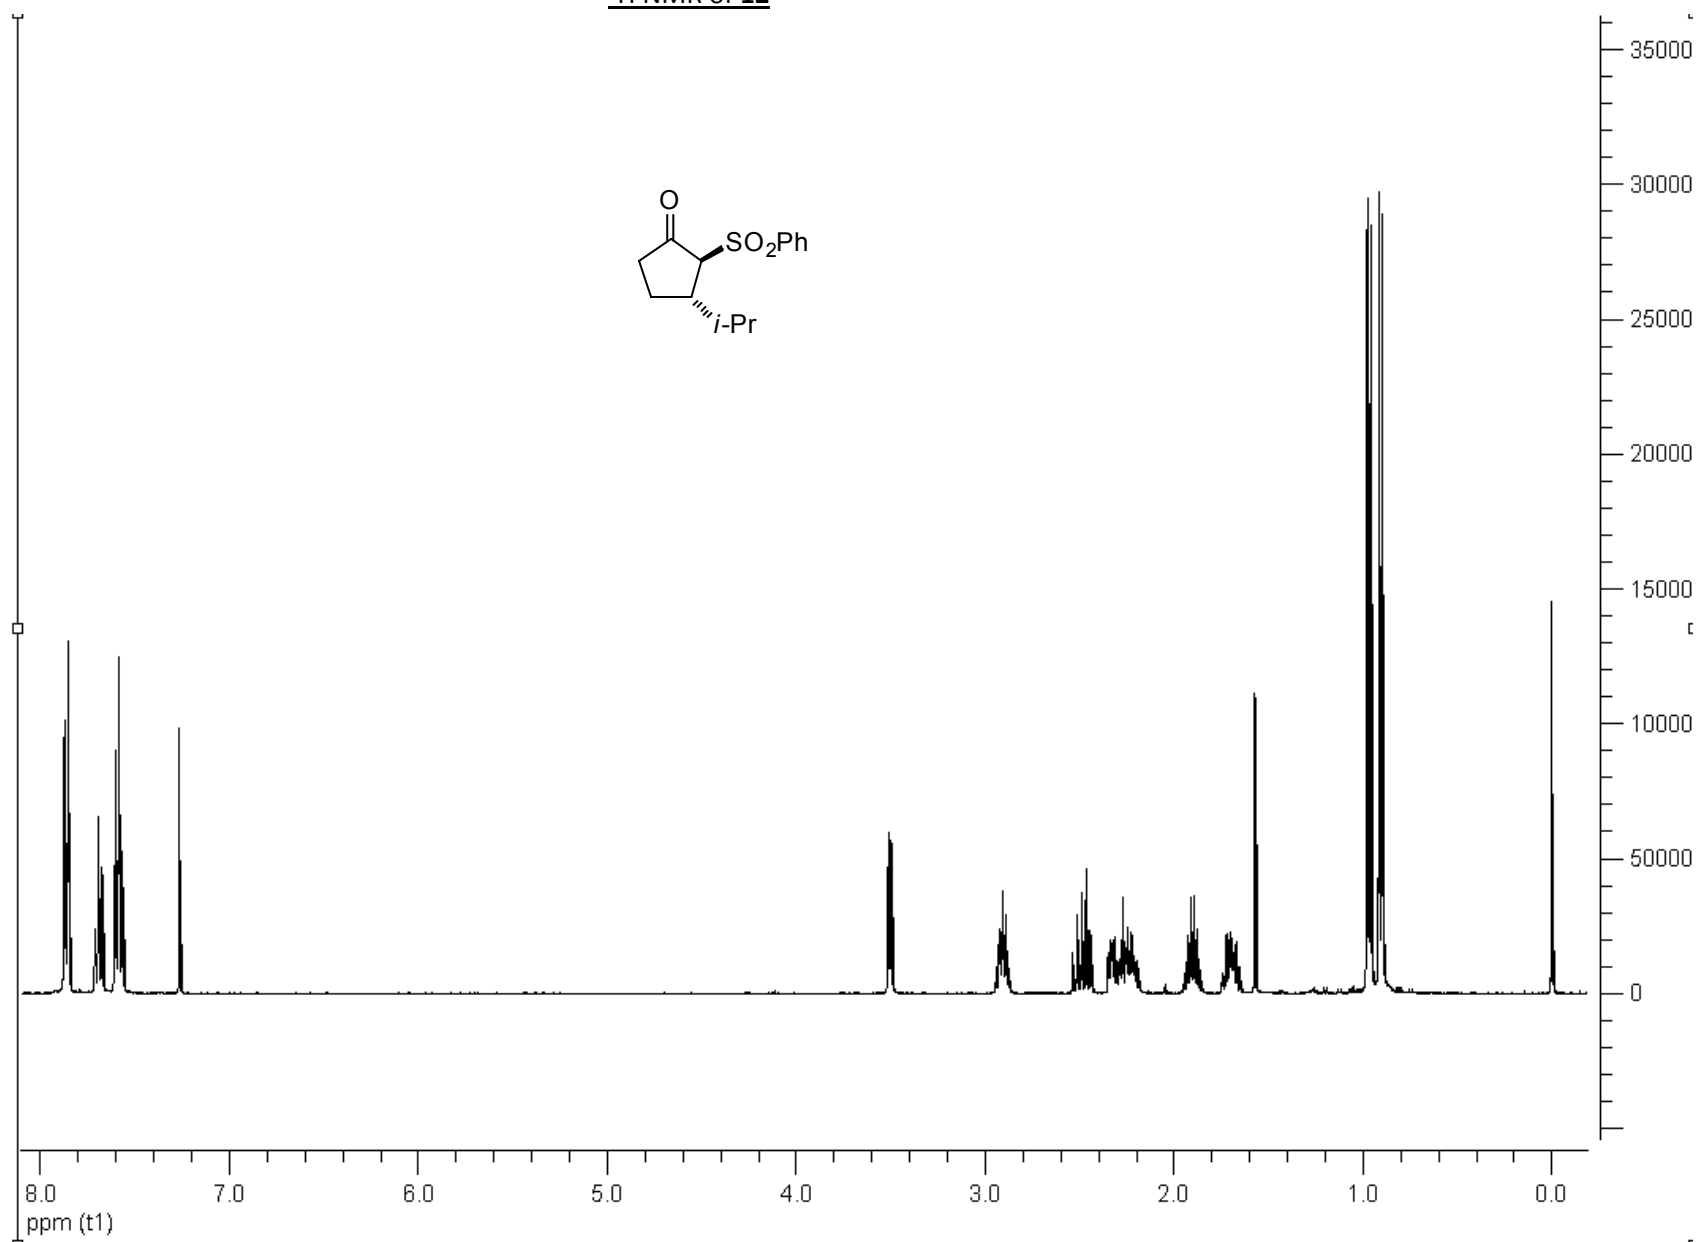



<sup>13</sup>C NMR of **12**

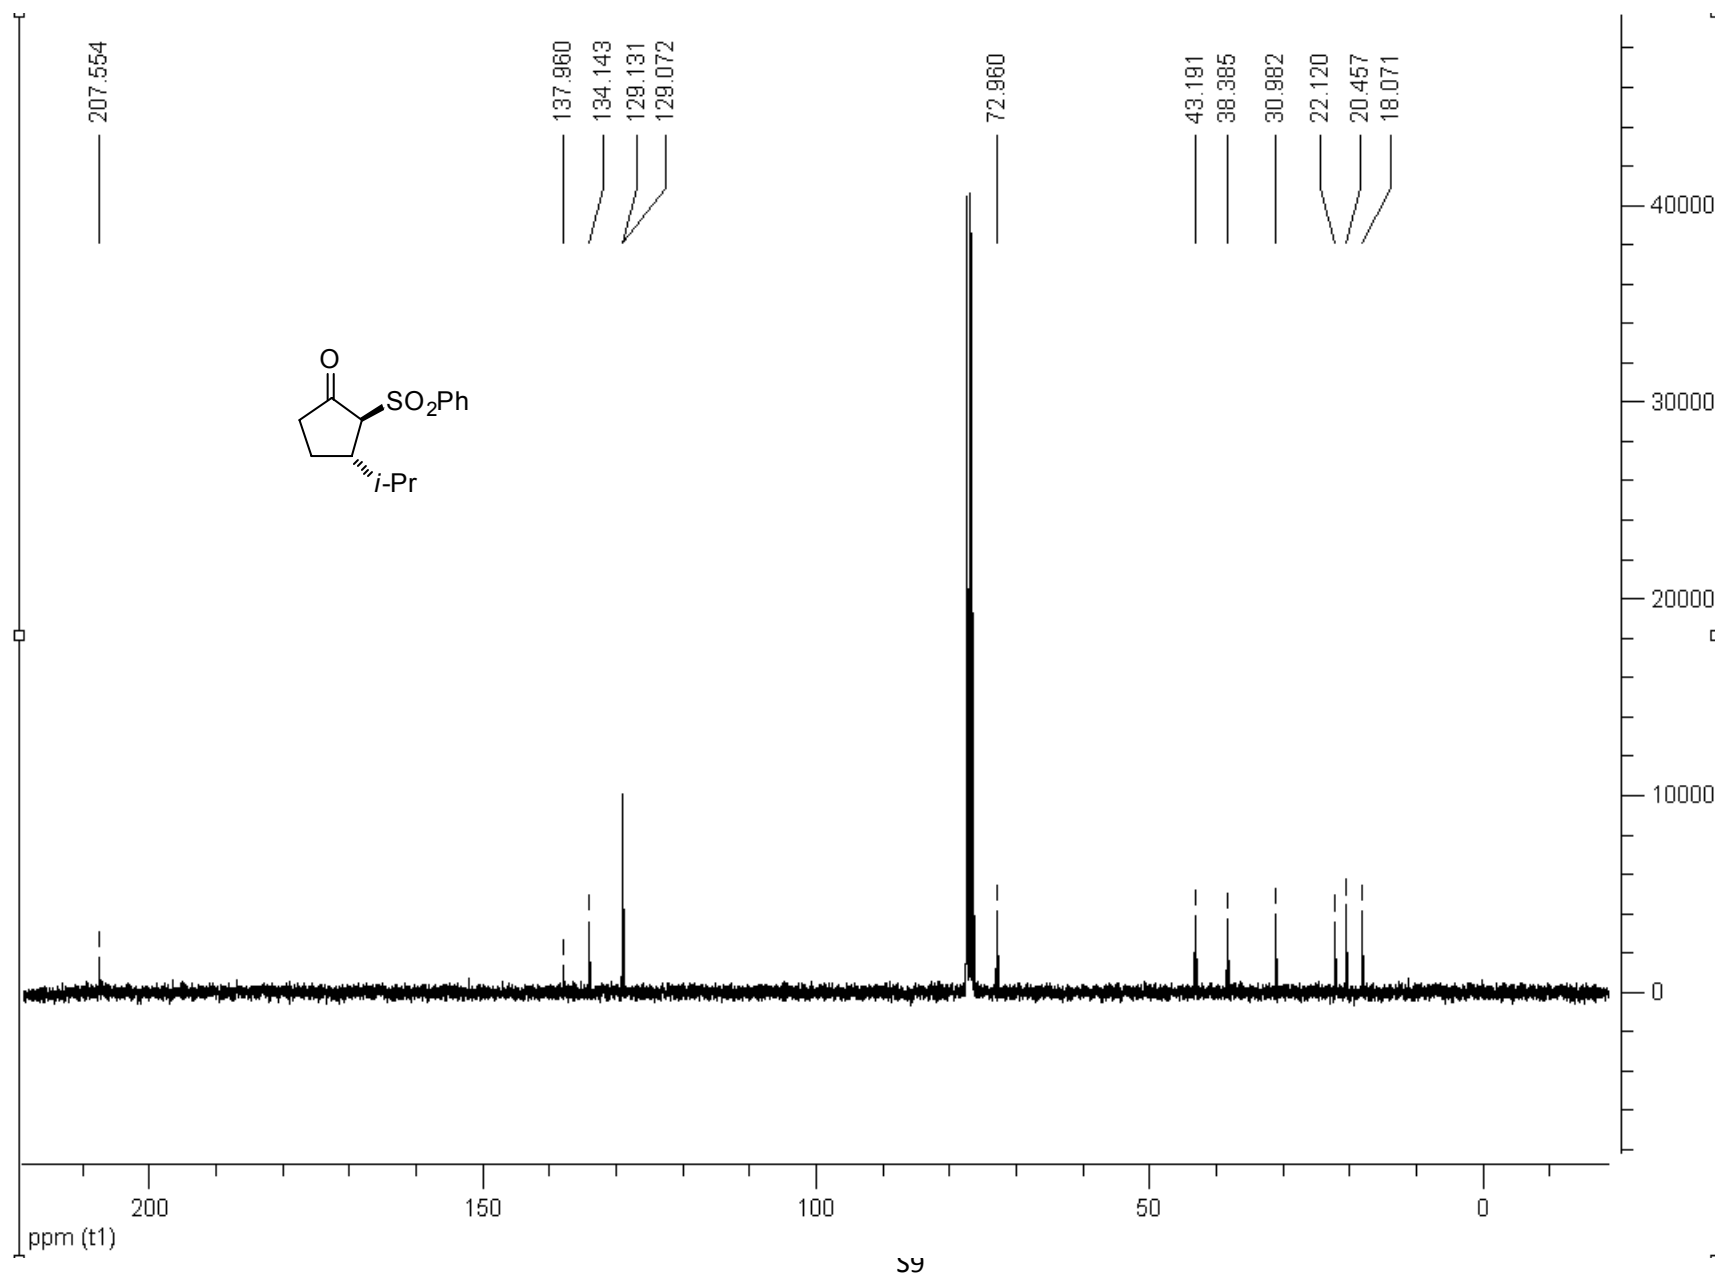

Supplement: c0ob00914h.pdf [file c0ob00914h.pdf]
